# Supplementary material for: Prediction of future falls in a community dwelling older adult population using instrumented balance and gait analysis
Source: Springer Nature journal article supplement (doi:10.1007/s00391-015-0885-0), 2015-04-11
Supplement: MOESM1 [file 10669056]

**Supplementary File 1.**

Variables calculated from the force plate data & the instrumented walkway

| Static Posturography |  |  |  |  |  |
| --- | --- | --- | --- | --- | --- |
| Variable | Test | Direction | Non Fallers (n=49) | Fallers | Group Effect |
| Mean velocity of CoP in mm/s | EO |  | 11.8 (±3.6) | 15.0 (±6.6) | .045 |
|  | EC |  | 18.3 (±8.1) | 24.3 (±11.4) | .012 |
|  | NEO |  | 17.1 (±5.4) | 22.1 (±9.4) | .039 |
|  | NEC |  | 32.4 (±13.8) | 37.6 (±18.0) | .174 |
| Surface of CoP movement (95% confidence ellipse) in mm2 | EO |  | 247.8 (±198.4) | 298.1 (±134.1) | .019 |
|  | EC |  | 459.8 (±447.8) | 608.1 (±411.6) | .005 |
|  | NEO |  | 402.5 (±305.6) | 510.3 (±277.7) | .028 |
|  | NEC |  | 1128.9 (±1175.1) | 1164.2 (±609.3) | .090 |
| Length of CoP trajectories in mm (total and ML and AP direction) | EO | Total | 352.8 (±113.9) | 459.9 (±211.9) | .033 |
|  |  | ML | 205.3 (±67.1) | 252.4 (±85.3) | .021 |
|  |  | AP | 240.7 (±89.7) | 326.7 (±192.5) | .067 |
|  | EC | Total | 555.4 (±257.1) | 741.6 (±379.1) | .021 |
|  |  | ML | 292.3 (±127.9) | 384.0 (±152.9) | .012 |
|  |  | AP | 406.7 (±212.7) | 547.2 (±328.9) | .046 |
|  | NEO | Total | 517.4 (±174.2) | 676.0 (±301.6) | .039 |
|  |  | ML | 358.2 (±126.7) | 458.5 (±196.2) | .039 |
|  |  | AP | 297.5 (±113.7) | 392.5 (±212.5) | .101 |
|  | NEC | Total | 969.9 (±428.3) | 1195.3 (±526.9) | .079 |
|  |  | ML | 659.1 (±283.5) | 801.0 (±291.1) | .063 |
|  |  | AP | 564.7 (±288.4) | 704.8 (±402.5) | .141 |
| Amplitudes of CoP movement | EO | Ratio | 1.1 (±.3) | 1.1 (±.3) | .803 |
|  |  | ML | 19.9 (±7.7) | 22.4 (±6.3) | .043 |
|  |  | AP | 21.2 (±7.4) | 24.7 (±6.8) | .015 |
|  | EC | Ratio | 1.2 (±.3) | 1.2 (±.4) | .369 |
|  |  | ML | 25.9 (±11.8) | 33.8 (±10.5) | .001 |
|  |  | AP | 29.1 (±10.6) | 36.2 (±13.4) | .004 |
|  | NEO | Ratio | .8 (±.1) | .9 (±.2) | .199 |
|  |  | ML | 30.7 (±10.9) | 34.8 (±12.2) | .178 |
|  |  | AP | 24.2 (±7.8) | 28.6 (±9.7) | .066 |
|  | NEC | Ratio | .8 (±2) | .9 (±.2) | .023 |
|  |  | ML | 52.3 (±32.6) | 54.2 (±15.5) | .194 |
|  |  | AP | 39.1 (±24.0) | 43.2 (±13.9) | .018 |
| Coefficient of sway direction | EO |  | -.14 (±.22) | 0 (±.23) | .015 |
|  | EC |  | -.14 (±.19) | 0 (±.17) | .008 |
|  | NEO |  | 0 (±.19) | -.03 (±.17) | .446 |
|  | NEC |  | 0 (±.15) | -.03 (±.11) | .287 |
| Energy Content of all sway frequencies* | EO | ML | 139.9 (±126.0) | 165.5 (±95.2) | .060 |
|  |  | AP | 154.8 (±122.3) | 195.8 (±99.0) | .006 |
|  | EC | ML | 263.9 (±332.9) | 313.2 (±187.9) | .010 |
|  |  | AP | 280.1 (±249.0) | 422.3 (±390.9) | .005 |
|  | NEO | ML | 313.9 (±303.7) | 370.2 (±245.6) | .081 |
|  |  | AP | 179.5 (±125.1) | 245.2 (±146.1) | .045 |
|  | NEC | ML | 881.8 (±895.2) | 886.4 (449.0) | .162 |
|  |  | AP | 472.9 (±530.9) | 545.1 (±350.2) | .017 |
| Energy Content of sway frequencies 0-.5Hz* | EO | ML | 118.4 (±119.0) | 132.7 (±91.2) | .113 |
|  |  | AP | 127.2 (±112.7) | 145.5 (±73.6) | .029 |
|  | EC | ML | 219.8 (±305.0) | 247.1 (±69.8) | .019 |
|  |  | AP | 206.5 (±223.2) | 291.7 (±273.2) | .008 |
|  | NEO | ML | 253.1 (±283.9) | 269.7 (±206.6) | .140 |
|  |  | AP | 140.0 (±113.9) | 170.4 (±108.4) | .127 |
|  | NEC | ML | 609.6 (690.5) | 584.0 (±292.5) | .097 |
|  |  | AP | 321.9 (±414.8) | 330.7 (±167.3) | .018 |
| Energy Content of sway frequencies .5-2Hz* | EO | ML | 20.2 (±13.2) | 29.4 (±17.3) | .017 |
|  |  | AP | 24.1 (±17.4) | 43.9 (±48.9) | .029 |
|  | EC | ML | 36.6 (±34.2) | 64.1 (±47.4) | .001 |
|  |  | AP | 66.6 (±65.3) | 112.6 (±130.7) | .035 |
|  | NEO | ML | 57.4 (±35.6) | 94.3 (±91.2) | .101 |
|  |  | AP | 35.9 (±23.9) | 66.5 (±64.8) | .067 |
|  | NEC | ML | 251.8 (±378.1) | 274.9 (±228.5) | .240 |
|  |  | AP | 132.9 (±149.9) | 192.3 (±211.2) | .162 |
| Energy Content of sway frequencies >2Hz* | EO | ML | 1.0 (±.9) | 1.7 (±1.2) | .007 |
|  |  | AP | 2.2 (±1.8) | 4.3 (±4.9) | .037 |
|  | EC | ML | 1.9 (±1.8) | 3.6 (±3.9) | .020 |
|  |  | AP | 5.5 (±6.3) | 11.2 (±15.6) | .044 |
|  | NEO | ML | 3.1 (±2.2) | 5.2 (±5.4) | .081 |
|  |  | AP | 3.0 (±2.8) | 5.7 (±6.8) | .210 |
|  | NEC | ML | 12.1 (±14.7) | 16.0 (±14.6) | .116 |
|  |  | AP | 12.2 (±15.8) | 18.6 (±23.0) | .075 |
| Instrumented Gait Analysis |  |  |  |  |  |
| Step length in cm | W |  | 56.3 (±9.5) | 58.2 (±10.5) | .406 |
|  | C |  | 56.5 (±10.2) | 55.7 (±12.4) | .782 |
| Step Time in sec | W |  | .55 (±.06) | .55 (±.07) | .894 |
|  | C |  | .62 (±12) | .58 (±10) | .051 |
| Stride Length in cm | W |  | 113.1 (±18.9) | 116.7 (±20.7) | .500 |
|  | C |  | 113.1 (±20.4) | 111.4 (±24.9) | .763 |
| Stride Time in sec | W |  | 1.1 (±.12) | 1.1 (±.15) | .852 |
|  | C |  | 1.3 (±.2) | 1.2 (±.2) | .050 |
| Stride velocity in m/sec | W |  | 105.6 (±24.4) | 109.7 (±25.4) | .508 |
|  | C |  | 93.9 (±28.3) | 99.4 (±31.1) | .329 |
| Step width in cm | W |  | 9.6 (±3.8) | 9.3 (3.6) | .718 |
|  | C |  | 9.1 (±4.4) | 10.3 (±5.9) | .200 |
| Double support time in sec | W |  | .32 (±.07) | .31 (±.08) | .347 |
|  | C |  | .37 (±10) | .37 (±13) | .332 |
| Single support time in sec | W |  | .39 (±.04) | .39 (±.04) | .847 |
|  | C |  | .44 (±.08) | .39 (±.07) | .012 |

Notes: * Using Fast Fourier Transformations the frequency content of the CoP was estimated

AP- anterior posterior; C- walking while counting backwards 50-1; CoP- center of pressure; EO- standing upright with feet apart and eyes open; EC- standing upright with feet apart and eyes closed; ML- medio lateral; NEC- standing upright with feet together and eyes closed; NEO- standing upright with feet together and eyes open; W- walking at self-selected speed
